# Supplementary material for: Quantitative Characterization of the Influence of the Nanoscale Morphology of Nanostructured Surfaces on Bacterial Adhesion and Biofilm Formation
Source: PubMed Central journal article supplement (PMC3180288; doi:10.1371/journal.pone.0025029), 2011-09-26

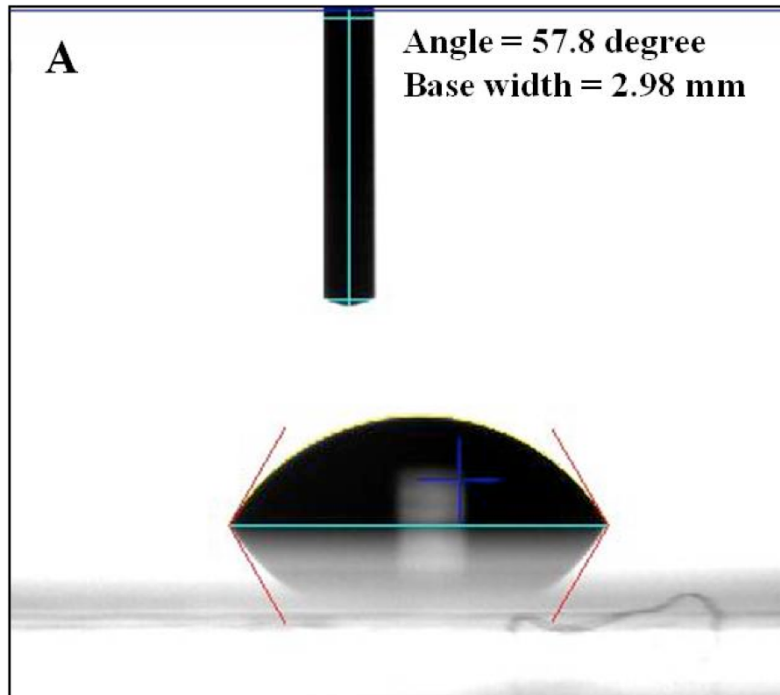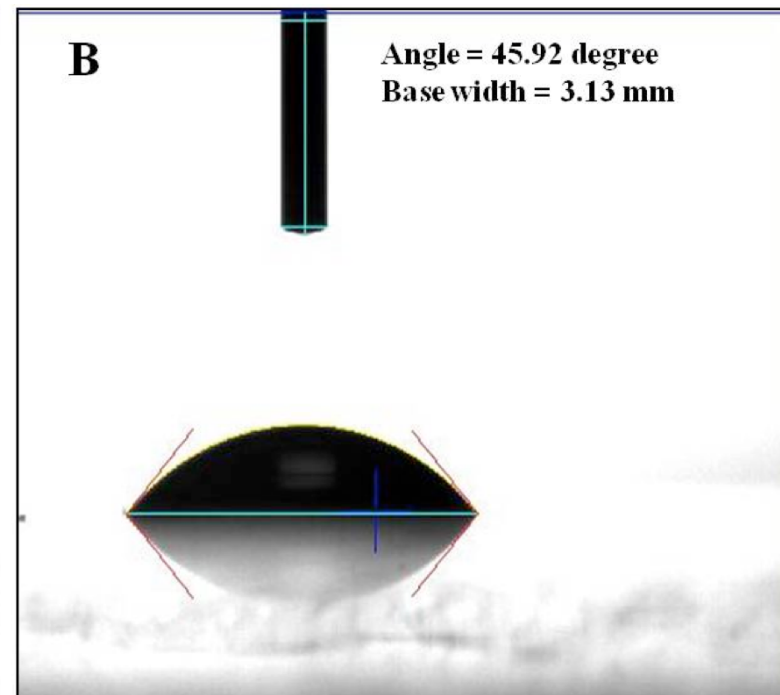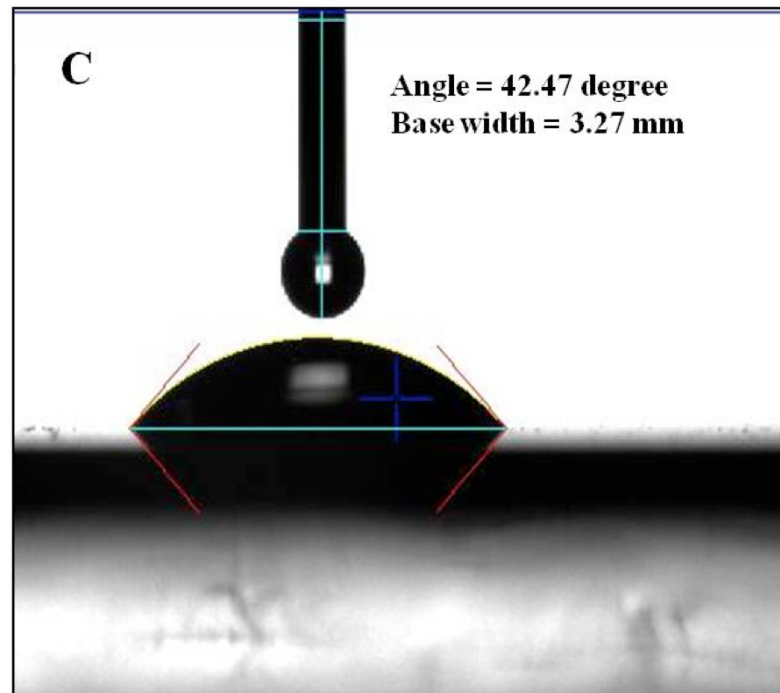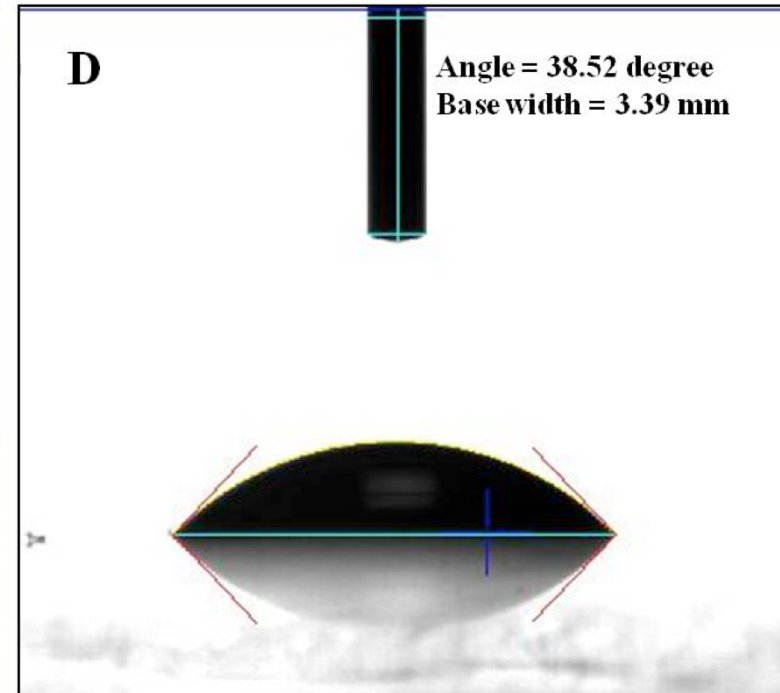

Supplement: pone.0025029.s002.pdf [file pone.0025029.s002.pdf]
