# Supplementary material for: Quantitative Characterization of the Influence of the Nanoscale Morphology of Nanostructured Surfaces on Bacterial Adhesion and Biofilm Formation
Source: PubMed Central journal article supplement (PMC3180288; doi:10.1371/journal.pone.0025029), 2011-09-26

Angle = 20,32 degrees  
Base Width = 4,4746mm

**A**

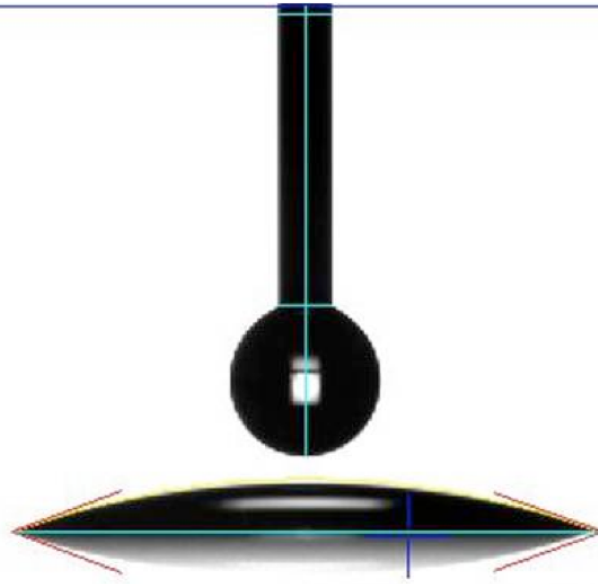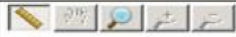

10.0 nm

**B**

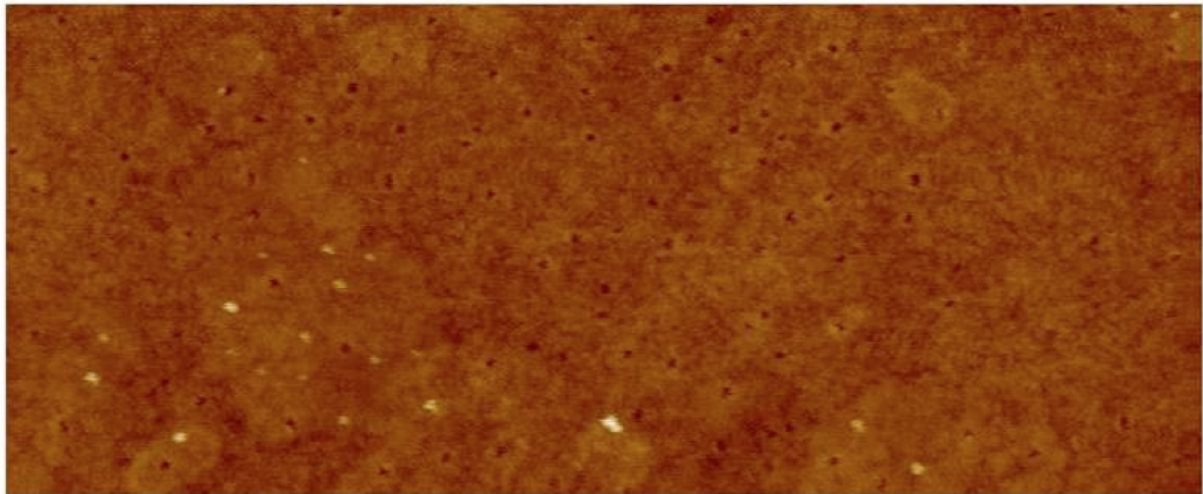

0.0

Height

2.0  $\mu\text{m}$

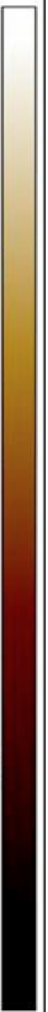

Supplement: pone.0025029.s003.pdf [file pone.0025029.s003.pdf]
