# Supplementary material for: Quantitative Characterization of the Influence of the Nanoscale Morphology of Nanostructured Surfaces on Bacterial Adhesion and Biofilm Formation
Source: PubMed Central journal article supplement (PMC3180288; doi:10.1371/journal.pone.0025029), 2011-09-26
Supplement: pone.0025029.s004.pdf [file pone.0025029.s004.pdf]

**Table S1. Thickness of ns-TiO<sub>2</sub> films measured by AFM and stylus profilometer**

The thickness values measured by AFM and stylus profilometer [1] agree within the experimental error and are very close to the nominal values ( $h = 50, 100, 200, 300$  nm).

| <b>Sample</b> | <b>Nominal thickness (nm)</b> | <b>Thickness by Profilometer (nm)</b> | <b>Thickness by AFM (nm)</b> |
|---------------|-------------------------------|---------------------------------------|------------------------------|
| SMP1          | 50                            | $64.1 \pm 6.4$                        | $54 \pm 6$                   |
| SMP2          | 100                           | $115.9 \pm 8.8$                       | $105.2 \pm 3.9$              |
| SMP3          | 200                           | $197 \pm 6.8$                         | $202 \pm 5.1$                |
| SMP4          | 300                           | $309 \pm 7.3$                         | $296.7 \pm 5.5$              |
