# Supplementary material for: Quantitative Characterization of the Influence of the Nanoscale Morphology of Nanostructured Surfaces on Bacterial Adhesion and Biofilm Formation
Source: PubMed Central journal article supplement (PMC3180288; doi:10.1371/journal.pone.0025029), 2011-09-26
Supplement: pone.0025029.s005.pdf [file pone.0025029.s005.pdf]

# **Quantitative characterization of the influence of nanoscale morphology of nanostructured surfaces on bacterial adhesion and biofilm formation**

Ajay Vikram Singh<sup>1,2</sup>, Varun Vyas<sup>1,2</sup>, Rajendra Patil<sup>3</sup>, Vimal Sharma<sup>1,4</sup>, Pasquale Emanuele Scopelliti<sup>2,4</sup>, Gero Bongiorno<sup>4</sup>, Alessandro Podestà<sup>2</sup>, Cristina Lenardi<sup>2,4</sup>, \*Wasudev Namdev Gade<sup>3</sup>, \*Paolo Milani<sup>2,4</sup>.

<sup>1</sup>European School of Molecular Medicine (SEMM), IFOM-IEO Campus, via Adamello 16, 20139, Milano, Italy.

<sup>2</sup>Interdisciplinary Centre for Nanostructured Materials and Interfaces (CIMAINA) and Department of Physics, via Celoria 16, Università degli Studi di Milano, 20133, Milano, Italy.

<sup>3</sup>Department of Biotechnology, University of Pune, Ganesh Khind, Pune-411007, India.

<sup>4</sup>Micro and Nano Fabrication Platform, Fondazione Filarete, Viale Ortles 22/4, 20139 Milano, Italy.

\* Corresponding authors. E-mail: [pmilani@mi.infn.it](mailto:pmilani@mi.infn.it); [wngade@unipune.ernet.in](mailto:wngade@unipune.ernet.in)

## **Supporting Text S1**

### **Table of Contents**

1 - Calculations of morphological parameters from AFM images

2 - Contact angle measurements and surface energy calculation on ns-TiO<sub>2</sub> films

3 - Bacterial live-dead cell counting using ImageJ

References

## 1 - Calculations of morphological parameters from AFM images

Several statistical morphological parameters have been calculated from AFM topographies: root-mean-square roughness (Rq), Skewness (Rsk), and Kurtosis (Rku), specific area  $A_{spec}$  [2]. Rq represents the rms deviation of height values from the mid plane value  $\bar{h}$ . For a Gaussian surface, about 68% of surface points have height between  $\bar{h}-Rq$  and  $\bar{h}+Rq$ . Gaussian surface possess a symmetric height values distribution, peaks and valleys being equally represented. Skewness (Rsk) is a statistical measure of the symmetry of the height distribution and it can highlight a prominence of valleys over peaks (Rsk<0), or vice versa (Rsk>0; for a symmetric surface, Rsk=0). Kurtosis quantifies the ‘peakedness’ of a surface. A surface with a Gaussian height distribution has a kurtosis value of 3; a surface with a narrower height distribution (sharp peaks and valleys over a rather flat background) has a kurtosis value greater than 3, while a surface that has a broader height distribution (rather continuous rounded asperities and valleys) has a kurtosis value of less than 3. AFM topographies are 2-dimensional arrays of height values, organized in rows and columns. Specific area is defined as the ratio of surface area to projected area; it is always larger than unity for rough surfaces. Statistical morphological parameters are calculated from AFM maps as listed below:

$$R_q = \sqrt{\frac{1}{N} \sum_{i,j} (h_{ij} - \bar{h})^2};$$

$$R_{sk} = \frac{1}{NR_q^3} \sum_{i,j} (h_{ij} - \bar{h})^3;$$

$$R_{ku} = \frac{1}{NR_q^4} \sum_{i,j} (h_{ij} - \bar{h})^4;$$

$$A_{spec} = \frac{1}{N} \sum_{i,j} \sqrt{1 + \nabla_{ij}^2}.$$

where  $h_{ij}$  represent the height values in the AFM topographic map ( $i,j$  are the row and column indices),  $N$  the total number of heights values in the map,  $\bar{h} = \frac{1}{N} \sum_{i,j} h_{ij}$  if the average height of the

surface (the quota of the surface mid plane), and  $\nabla_{ij}^2$  is the squared i,j-th element of the (discrete) surface gradient.

## **2 - Contact angle measurements and surface energy calculation for ns-TiO<sub>2</sub> films**

The Sessile Drop Technique was employed to measure contact angles of water and other liquids on ns-TiO<sub>2</sub> films and to calculate the solid surface energies based upon the Owens/Wendt theory [3], which relates the dispersive and polar components of the surface energy ( $\gamma^d$  and  $\gamma^p$ ) of the solid surface and the wetting liquid to the contact angle  $\theta$  and the total surface energy of the liquid:

$$\gamma_L(1 + \cos \theta) = 2\left(\sqrt{\gamma_L^d \gamma_S^d} + \sqrt{\gamma_L^p \gamma_S^p}\right)$$

The Owens-Wendt equation strictly holds for smooth surfaces; when applied to rough surfaces, the obtained surface energies should be considered as semi-empirical, not necessarily coincident with the thermodynamically-defined surface energies. In the case of rough ns-TiO<sub>2</sub> surfaces, reported SE represent the effective surface energies, which characterize this material with respect to its chemical nature and specific surface topography. In Table 1 of the present work total surface energies are reported, as calculated by instrument software by summing different surface free energy contributions (Lifshitz–van der Waals, acid/base, electron acceptor and electron donor).

## **3 - Bacterial live-dead cell counting using imageJ**

The imageJ tool enabled us to quantify the bac-light stained live-dead bacterial cells attached on ns-TiO<sub>2</sub> using four basic steps. We change the scale of the image to micrometer to spatially calibrate the image using line selection tool (Analyze>Set Scale). Next, we converted the image into grey scale by using Image>Type>RGB Stack command which split the image in the 3 channels (no blue channel in our case). Subsequently, we segmented (isolate) the red-green stained dead-live bacterial cells using thresholding and made the montage of the red-green

channel to quantify the stained bacterial cells by measuring the threshold area and area fraction tools (*Analyse>Measure*).

## References

- [1] Teague, E. C., Scire, F. E., Baker, S. M. & Jensen, S. W. Three-dimensional stylus profilometry. *Wear* 83, 1-12 (1982).
- [2] Gadelmawla, E. S., Koura, M. M., Maksoud, T. M. A., Elewa, I. M. & Soliman, H. H. Roughness parameters. *Journal of Materials Processing Technology* 123, 133-145 (2002).
- [3] D.K. Owens and R.C. Wendt, *J Appl Polym Sci* **13** (1969), p. 1741.
